# Supplementary material for: Pseudomonas aeruginosa Uses c-di-GMP Phosphodiesterases RmcA and MorA To Regulate Biofilm Maintenance
Source: PubMed Central journal article supplement (PMC7858071; doi:10.1128/mbio.03384-20), 2021-02-02
Supplement: mBio.03384-20-sf001.pdf [file mBio.03384-20-sf001.pdf]

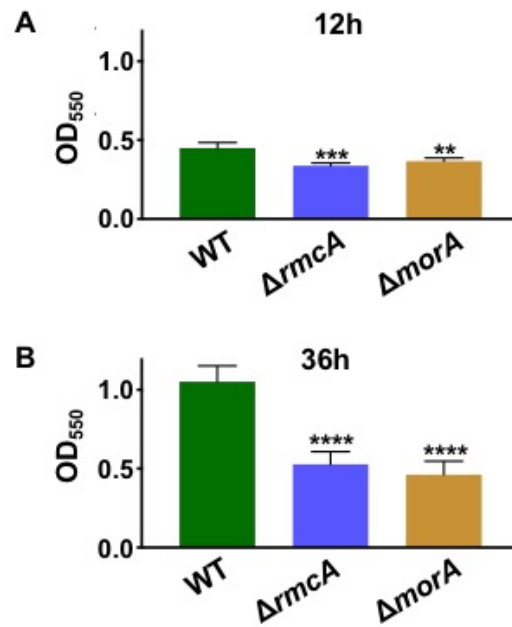

**Figure S1. The biofilm maintenance defect in PDE mutants is independent of carbon source.** Biofilms were grown in M63 minimal medium containing 20 mM pyruvate for 12 h (panel A) and 36 h (panel B), representing early and late stages of biofilm formation, respectively. Error bars represent standard deviation of the results from three biological replicates each performed with three technical replicates and tested for significance using an unpaired Student's T-test. \*\*, \*\*\*, \*\*\*\* indicate a difference in biofilm that is significantly different at a P value of <0.01, 0.001 and 0.0001, respectively, compared to the WT.
