# Supplementary material for: Pseudomonas aeruginosa Uses c-di-GMP Phosphodiesterases RmcA and MorA To Regulate Biofilm Maintenance
Source: PubMed Central journal article supplement (PMC7858071; doi:10.1128/mbio.03384-20), 2021-02-02
Supplement: mBio.03384-20-sf007.pdf [file mBio.03384-20-sf007.pdf]

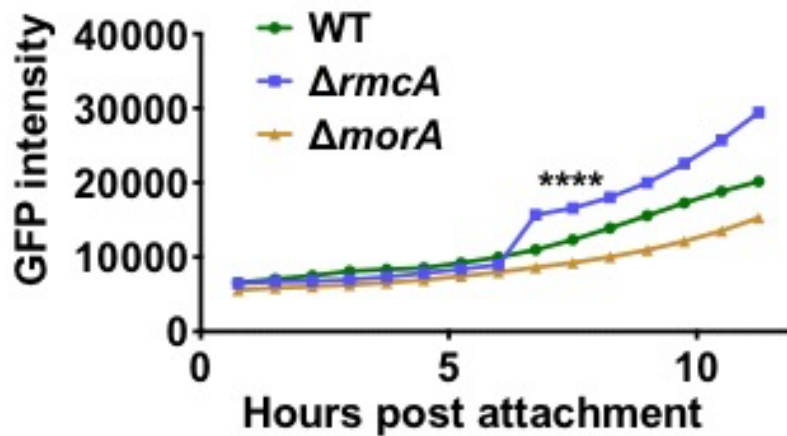

**Figure S7. Initial biofilm formation by the WT and  $\Delta rmcA$  and  $\Delta morA$  mutants.** The WT strain and the  $\Delta rmcA$  and  $\Delta morA$  mutants carrying pSMC21, a plasmid which constitutively expresses GFP, were inoculated into microfluidic chambers and allowed 1 hour to attach prior to beginning flow of the medium. GFP fluorescence was measured every 45 minutes for 12 h, plotted and tested for significance using a one-way multiple comparisons ANOVA. \*\*\*\* indicate a difference in biofilm that is significantly different from the WT at a P value of  $<0.0001$  at all times after 7 h of growth. There was no significant difference between WT and the *morA* mutant.
