# Supplementary material for: Pseudomonas aeruginosa Uses c-di-GMP Phosphodiesterases RmcA and MorA To Regulate Biofilm Maintenance
Source: PubMed Central journal article supplement (PMC7858071; doi:10.1128/mbio.03384-20), 2021-02-02
Supplement: mBio.03384-20-sf009.pdf [file mBio.03384-20-sf009.pdf]

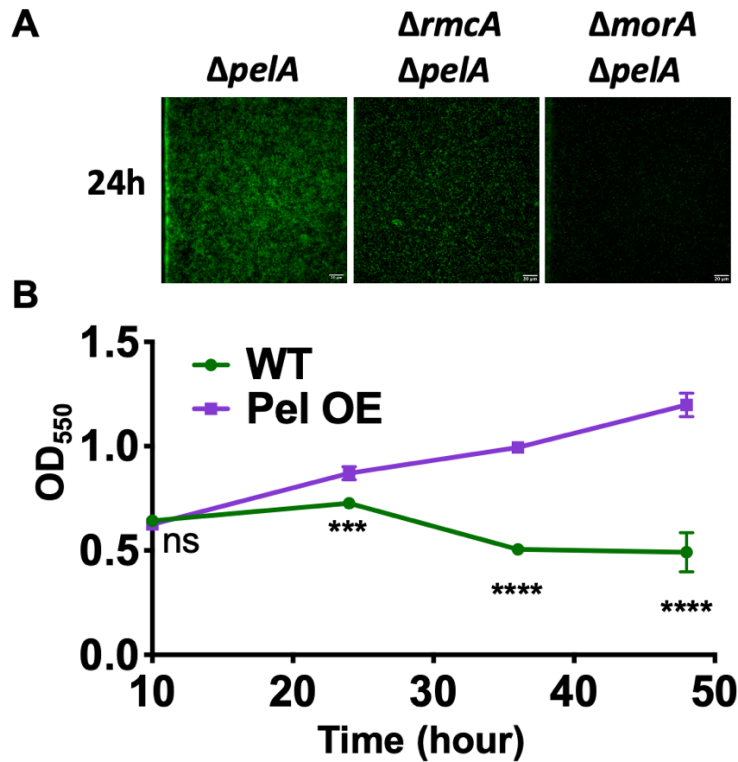

**Figure S9. Late stage biofilm defect cannot be induced or rescued with changes to *pel* expression alone.** (A) Overnight cultures of *ΔpelA*, *ΔrmcA ΔpelA* and *ΔmorA ΔpelA* mutants strains were inoculated into a microfluidics chamber and assayed for biofilm development at 24 h. (B) WT and an inducible Pel strain under the control of the P<sub>BAD</sub> promoter were compared for the presence of a late-stage biofilm defect. The Y-axis shows a measure of the biofilm formed. Biofilms were grown statically in KA biofilm medium supplemented with 0.4% arginine for 10, 24, 36 and 48 h, plotted and tested for significance using a one-way multiple comparisons ANOVA. Pel production was induced by the addition of 0.2% arabinose. \*\*\*, \*\*\*\* indicate a difference in biofilm that is significantly different at a P value of <0.001 and 0.0001, respectively, compared to the WT. NS indicates a non-significant result. Results shown are representative of two biological replicates each containing three technical replicates.
