# Supplementary material for: Pseudomonas aeruginosa Uses c-di-GMP Phosphodiesterases RmcA and MorA To Regulate Biofilm Maintenance
Source: PubMed Central journal article supplement (PMC7858071; doi:10.1128/mbio.03384-20), 2021-02-02
Supplement: mBio.03384-20-st001.pdf [file mBio.03384-20-st001.pdf]

**Table S1. Bacterial strains, plasmids and primers used in this study.**

| Strain                          | Description                                                                                                                                                                                    | Source     |
|---------------------------------|------------------------------------------------------------------------------------------------------------------------------------------------------------------------------------------------|------------|
| <b><i>E. coli</i></b>           |                                                                                                                                                                                                |            |
|                                 | Cloning strain; F <sup>-</sup> Φ80 <i>lacZ</i> ΔM15 Δ( <i>lacZYA-argF</i> )                                                                                                                    |            |
| DH5α                            | U169 <i>recA1 endA1 hsdR17</i> (r <sub>K</sub> <sup>-</sup> , m <sub>K</sub> <sup>+</sup> ) <i>phoA supE44 λ</i> <sup>-</sup><br><i>thi-1 gyrA96 relA1</i>                                     | Invitrogen |
| SM10                            | Bi-parental mating strain; <i>thi thr leu tonA lacY supE</i><br><i>recA::RP4-2-Tc::Mu K<sub>m</sub> λpir</i> , Kan <sup>R</sup> , Tet <sup>R</sup>                                             | (1)        |
| BTH101                          | BACTH strain; F <sup>-</sup> <i>cya-99 araD139 galE15 galk16</i><br><i>rpsL1</i> (Str <sup>R</sup> ) <i>hsdR2 mcrA1 mcrB1</i>                                                                  | Euromedex  |
| <b><i>P. aeruginosa</i></b>     |                                                                                                                                                                                                |            |
| PAO1                            | Wild-type strain                                                                                                                                                                               | M. Parsek  |
| PAO1 Δ <i>wspF</i> Δ <i>psl</i> | PAO1 Δ <i>wspF</i> (in-frame); Δ <i>pslBCD</i> (polar); <i>araC</i> -P <sub>BAD</sub>                                                                                                          | (2)        |
| P <sub>BAD</sub> <i>pel</i>     | inserted upstream of <i>pelABCDEFGHI</i>                                                                                                                                                       |            |
| GBW1                            | PAO1 Δ <i>wspF</i> Δ <i>psl</i> P <sub>BAD</sub> <i>pel</i> Δ <i>rmcA</i>                                                                                                                      | This study |
| GBW2                            | PAO1 Δ <i>wspF</i> Δ <i>psl</i> P <sub>BAD</sub> <i>pel</i> Δ <i>morA</i>                                                                                                                      | This study |
| GBW3                            | PAO1 Δ <i>wspF</i> Δ <i>psl</i> P <sub>BAD</sub> <i>pel</i> Δ <i>rmcA</i> <i>attTn7::miniTn7T</i> -<br>Gm:: <i>araC</i> -P <sub>BAD</sub> :: <i>rmcA</i> , Gen <sup>R</sup>                    | This study |
| GBW4                            | PAO1 Δ <i>wspF</i> Δ <i>psl</i> P <sub>BAD</sub> <i>pel</i> Δ <i>morA</i> <i>attTn7::miniTn7T</i> -<br>Gm:: <i>araC</i> -P <sub>BAD</sub> :: <i>morA</i> , Gen <sup>R</sup>                    | This study |
| GBW5                            | PAO1 Δ <i>wspF</i> Δ <i>psl</i> P <sub>BAD</sub> <i>pel</i> Δ <i>rmcA</i> <i>attTn7::miniTn7T</i> -<br>Gm:: <i>araC</i> -P <sub>BAD</sub> :: <i>rmcA</i> <sup>C-VSV-G</sup> , Gen <sup>R</sup> | This study |
| GBW6                            | PAO1 Δ <i>wspF</i> Δ <i>psl</i> P <sub>BAD</sub> <i>pel</i> Δ <i>morA</i> <i>attTn7::miniTn7T</i> -<br>Gm:: <i>araC</i> -P <sub>BAD</sub> :: <i>morA</i> <sup>C-VSV-G</sup> , Gen <sup>R</sup> | This study |
| SMC232                          | UCBPP-PA14                                                                                                                                                                                     | (3)        |

|         |                                                                                                 |            |
|---------|-------------------------------------------------------------------------------------------------|------------|
| SMC6279 | PA14 $\Delta rmcA$ (in-frame)                                                                   | (4)        |
| SMC6289 | PA14 $\Delta morA$ (in-frame)                                                                   | (4)        |
| SMC7006 | PA14 <i>att::DMS3<sub>42</sub></i>                                                              | (5)        |
| SMC2893 | PelA KO                                                                                         | (6, 7)     |
| SMC6607 | Pel inducible, P <sub>pel</sub> replaced with P <sub>bad</sub>                                  | (8)        |
| SMC8808 | PA14 $\Delta rmcA$ <i>att::DMS3<sub>42</sub></i>                                                | This study |
| SMC8809 | PA14 $\Delta morA$ <i>att::DMS3<sub>42</sub></i>                                                | This study |
| SMC8810 | PA14 pKNT25 GcbC R363E                                                                          | This study |
| SMC8811 | PA14 $\Delta rmcA$ pKNT25 GcbC R363E                                                            | This study |
| SMC8812 | PA14 $\Delta morA$ pKNT25 GcbC R363E                                                            | This study |
| SMC8813 | PA14 $\Delta rmcA$ <i>attTn7::miniTn7T-Gm::araC-P<sub>BAD</sub>::rmcA</i> ,<br>Gen <sup>R</sup> | This study |
| SMC8814 | PA14 $\Delta morA$ <i>attTn7::miniTn7T-Gm::araC-P<sub>BAD</sub>::morA</i> ,<br>Gen <sup>R</sup> | This study |
| SMC8815 | PA14 $\Delta rmcA$ :P <sub>tac</sub> - <i>mKO</i> -κ                                            | This study |
| SMC8816 | PA14 $\Delta morA$ :P <sub>tac</sub> - <i>mKO</i> -κ                                            | This study |
| SMC8817 | PA14 $\Delta rmcA$ :P <sub>smc21</sub> - <i>gfp</i>                                             | This study |
| SMC8818 | PA14 $\Delta morA$ :P <sub>smc21</sub> - <i>gfp</i>                                             | This study |
| SMC8819 | PA14 $\Delta rmcA$ $\Delta pelA$                                                                | This study |
| SMC8820 | PA14 $\Delta morA$ $\Delta pelA$                                                                | This study |
| SMC8821 | PA14 $\Delta rmcA$ , inducible Pel under the control of P <sub>BAD</sub>                        | This study |
| SMC8822 | PA14 $\Delta morA$ inducible Pel under the control of P <sub>BAD</sub>                          | This study |

---

| Plasmid                          | Description                                                                                                                                                                           | Source     |
|----------------------------------|---------------------------------------------------------------------------------------------------------------------------------------------------------------------------------------|------------|
| <b>Two-step allelic exchange</b> |                                                                                                                                                                                       |            |
| pEX18Gm                          | Suicide vector for allelic exchange in <i>P. aeruginosa</i> , encodes SacB, Gen <sup>R</sup>                                                                                          | (1)        |
| pEX18Gm:: <i>ΔrmcA</i>           | pEX18Gm with <i>P. aeruginosa</i> PAO1 <i>ΔrmcA</i> allele cloned between the EcoRI and HindIII sites, Gen <sup>R</sup>                                                               | This study |
| pEX18Gm:: <i>ΔmorA</i>           | pEX18Gm with <i>P. aeruginosa</i> PAO1 <i>ΔmorA</i> allele cloned between the SacI and HindIII sites, Gen <sup>R</sup>                                                                | This study |
| pSMC21                           | pUCP-based plasmid containing <i>gfpmut2</i> , Ap <sup>r</sup> , Cb <sup>r</sup> , Km <sup>r</sup>                                                                                    | (9)        |
| pMQ30                            | Suicide vector; Gm <sup>r</sup> , <i>sacB</i> , <i>URA3</i> , <i>CEN6/ARSH4</i> , <i>lacZα</i>                                                                                        | (10)       |
| pKO PA14_07500                   | PA14_07500 knockout construct in pMQ30                                                                                                                                                | (4)        |
| pKO PA14_07500                   | PA14_60870 ( <i>morA</i> ) knockout construct in pMQ30                                                                                                                                | (4)        |
| pKNT25 GcbC-R363E                | GcbC protein with an I-site mutation                                                                                                                                                  | (11)       |
| <b>Complementation analysis</b>  |                                                                                                                                                                                       |            |
| pUC18T-miniTn7T-Gm               | <i>aacC1</i> on miniTn7-based vector with transcriptional terminators at the right end of the Tn7 transposon; Amp <sup>R</sup> , Gen <sup>R</sup>                                     | (12)       |
| pUC18T-miniTn7T-Gm-pBAD          | pUC18T-miniTn7T-Gm containing <i>araC</i> -P <sub>BAD</sub> and a downstream MCS (SmaI-NotI-PstI-NcoI) cloned between the HindIII and SacI sites; Amp <sup>R</sup> , Gen <sup>R</sup> | This study |

|                                           |                                                                                                                                                        |            |
|-------------------------------------------|--------------------------------------------------------------------------------------------------------------------------------------------------------|------------|
| pTNS2                                     | Helper plasmid encoding <i>tnsABCD</i> , Amp <sup>R</sup>                                                                                              | (13)       |
|                                           | pUC18T-miniTn7T-Gm-pBAD with <i>P. aeruginosa</i>                                                                                                      |            |
| p-miniTn7- <i>rmcA</i>                    | PAO1 <i>rmcA</i> fused to an upstream synthetic ribosome binding site, cloned between the SmaI and NotI sites; Amp <sup>R</sup> , Gen <sup>R</sup>     | This study |
|                                           | pUC18T-miniTn7T-Gm-pBAD with <i>P. aeruginosa</i>                                                                                                      |            |
| p-miniTn7- <i>morA</i>                    | PAO1 <i>morA</i> fused to an upstream synthetic ribosome binding site, cloned between the NotI and Mph1103I sites; Amp <sup>R</sup> , Gen <sup>R</sup> | This study |
| p-miniTn7- <i>rmcA</i> <sup>C-VSV-G</sup> | p-miniTn7- <i>rmcA</i> fused to a downstream VSV-G tag; Amp <sup>R</sup> , Gen <sup>R</sup>                                                            | This study |
| p-miniTn7- <i>morA</i> <sup>C-VSV-G</sup> | p-miniTn7- <i>morA</i> fused to a downstream VSV-G tag; Amp <sup>R</sup> , Gen <sup>R</sup>                                                            | This study |

---

**BACTH assays**

---

|             |                                                                                                                                 |      |
|-------------|---------------------------------------------------------------------------------------------------------------------------------|------|
| pUT18C      | Encodes T18 fragment of <i>B. pertussis</i> adenylate cyclase toxin on N-terminus, Amp <sup>R</sup>                             | (14) |
| pKT25       | Encodes T25 fragment of <i>B. pertussis</i> adenylate cyclase toxin on N-terminus, Kan <sup>R</sup>                             | (14) |
| pUT18C::zip | BACTH positive control, pUT18C containing sequence coding for the leucine zipper region of yeast GCN4 protein, Amp <sup>R</sup> | (14) |
| pKT25::zip  | BACTH positive control, pKT25 containing sequence coding for the leucine zipper region of yeast GCN4 protein, Kan <sup>R</sup>  | (14) |

|                       |                                                                                                                                                                                                                          |            |
|-----------------------|--------------------------------------------------------------------------------------------------------------------------------------------------------------------------------------------------------------------------|------------|
| pKT25:: <i>pelD</i>   | <i>P. aeruginosa</i> PAO1 <i>pelD</i> cloned into the XbaI and BamHI sites of pKT25, Kan <sup>R</sup>                                                                                                                    | (15)       |
| pUT18C:: <i>rncA</i>  | <i>P. aeruginosa</i> PAO1 <i>rncA</i> cloned into the XbaI and SmaI sites of pUT18C, Amp <sup>R</sup>                                                                                                                    | This study |
| pUT18C:: <i>morA</i>  | <i>P. aeruginosa</i> PAO1 <i>morA</i> cloned into the XbaI and KpnI sites of pUT18C, Amp <sup>R</sup>                                                                                                                    | This study |
| pBADGr                | For expression of third protein in the BACTH assay, <i>ori araC-P<sub>BAD</sub> dhfr::Gm<sup>R</sup> mob<sup>+</sup>, Gen<sup>R</sup></i>                                                                                | (16)       |
| pBADGr:: <i>pelE</i>  | <i>P. aeruginosa</i> PAO1 <i>pelE</i> cloned into the EcoRI and HindIII sites of pBADGr with synthetic RBS (GAGGAGGATATTC), Gen <sup>R</sup>                                                                             | (15)       |
| pBADGr:: <i>pelG</i>  | <i>P. aeruginosa</i> PAO1 <i>pelG</i> cloned into the EcoRI and HindIII sites of pBADGr with synthetic RBS (GAGGAGGATATTC), Gen <sup>R</sup>                                                                             | (15)       |
| pBADGr:: <i>pelEG</i> | <i>P. aeruginosa</i> PAO1 <i>pelE</i> and <i>pelG</i> ORFs separated by a clean, unmarked deletion of <i>pelF</i> cloned into the EcoRI and HindIII sites of pBADGr with synthetic RBS (GAGGAGGATATTC), Gen <sup>R</sup> | This study |

---

Abbreviations: Amp, ampicillin; Kan, kanamycin; Gen, gentamicin; Str, streptomycin; Tet, tetracycline

| <b>Primers</b>                         | <b>Sequence*</b>                                                                                           |
|----------------------------------------|------------------------------------------------------------------------------------------------------------|
| <b>Allelic exchange vectors</b>        |                                                                                                            |
| <i>rnc</i> APAO1upF                    | GGG <b>GAA TTC</b> <u>GAA CCA CGA GAC CGA CGA GA</u>                                                       |
| <i>rnc</i> APAO1upR                    | <u>TAC CGG CGC TTC TCG GGG AGC ACA CAG GAG AAG</u><br>CAC GGC CTG                                          |
| <i>rnc</i> APAO1downF                  | <u>GCT CCC CGA GAA GCG CCG GTA</u>                                                                         |
| <i>rnc</i> APAO1downR                  | AGG <b>AAG CTT</b> <u>GGA ATA ACC AAC GGT GCC AGG T</u>                                                    |
| <i>mor</i> APAO1upF                    | AAT <b>GAG CTC</b> <u>TCC TAC CTG GAA GCG CTG GA</u>                                                       |
| <i>mor</i> APAO1upR                    | <u>TCA GCC CTC GTT GAA CAT GAA CGA CGG GGT TAG</u><br>CGA GGG GGT                                          |
| <i>mor</i> APAO1downF                  | <u>TTC ATG TTC AAC GAG GGC TGA</u>                                                                         |
| <i>mor</i> APAO1downR                  | GGG <b>AAG CTT</b> <u>AGG TAG ACC GCG GCG TTG GC</u>                                                       |
| <b>miniTn7 complementation vectors</b> |                                                                                                            |
| miniTn7-pBAD-F                         | GGG <b>AAG CTT</b> <u>TTA TGA CAA CTT GAC GGC TA</u>                                                       |
| miniTn7-pBAD-R                         | GGG <b>GAG CTC</b> <u>CCA TGG CTG CAG GCG GCC GCC CCG</u><br>GGC <u>AAA AAA ACG GGT ATG GAG AAA CAG TA</u> |
| <i>rncA</i> -miniTn7-F                 | GAG <b>CCC GGG AGG AGG ATA TTC</b> <u>ATG CAG CGT CTG</u><br>CAG GCC GT                                    |
| <i>rncA</i> -miniTn7-R                 | GGG <b>GCG GCC GCT</b> <u>TAT ACC GGC GCT TCT CGG GG</u>                                                   |
| <i>morA</i> -miniTn7-F                 | GGG <b>GCG GCC GCA GGA GGA TAT TCG</b> <u>TGT CGA CCC</u><br>CCT CGC TAA C                                 |
| <i>morA</i> -miniTn7-R                 | GGG <b>ATG CAT</b> <u>TCA GCC CTC GTT GAA CAT GAA CA</u>                                                   |
| <i>rncA</i> -C-VSV-G-F                 | TGA ATA GAT TAG GAA AAT <u>AAG CGG CCG CCT GCA GC</u>                                                      |
| <i>rncA</i> -C-VSV-G-R                 | TTT CAA TAT CTG TAT <u>ATA CCG GCG CTT CTC GGG GA</u>                                                      |

|                        |                                                                        |
|------------------------|------------------------------------------------------------------------|
| <i>morA</i> -C-VSV-G-F | ATA GAT TAG GAA AAT <u>GAA TGC ATG ATC GAA TTA GCT</u><br><u>TCA A</u> |
| <i>morA</i> -C-VSV-G-R | TCA TTT CAA TAT CTG TAT <u>AGC CCT CGT TGA ACA TGA</u><br><u>ACA G</u> |

---

**BACTH vectors**

|                              |                                                                                       |
|------------------------------|---------------------------------------------------------------------------------------|
| <i>pelD</i> -BACTH-F         | GGG <b>TCT AGA</b> <u>GAT GTC CGC GCA CAA GGA TTT CA</u>                              |
| <i>pelD</i> -BACTH-R         | GTT <b>GGA TCC</b> <u>CCT AAA TAG CCA CTT GCT GAT CAT TC</u>                          |
| <i>rmcA</i> -BACTH-F         | GAT <b>TCT AGA</b> <u>GAT GCA GCG TCT GCA GGC CG</u>                                  |
| <i>rmcA</i> -BACTH-R         | GAG <b>CCC GGG</b> <u>TTA TAC CGG CGC TTC TCG GG</u>                                  |
| <i>morA</i> -BACTH-F         | GAG <b>TCT AGA</b> <u>GGT GTC GAC CCC CTC GCT AA</u>                                  |
| <i>morA</i> -BACTH-R         | GTG <b>GGT ACC</b> <u>TCA GCC CTC GTT GAA CAT GAA C</u>                               |
| <i>pelE</i> -BADGr-F         | GGG <b>GAA TTC</b> GAG GAG GAT ATT <u>CAT GAT CAG CAA</u><br><u>GTG GCT ATT TAG C</u> |
| <i>pelE</i> -BADGr-R         | GAG <b>AAG CTT</b> <u>TCA TGT CCA GTA TCT CGC CAG</u>                                 |
| <i>pelG</i> -BADGr-F         | GGG <b>GAA TTC</b> GAG GAG GAT ATT <u>CAT GGC CGG CAT</u><br><u>CGG CTTC</u>          |
| <i>pelG</i> -BADGr-R         | GAG <b>AAG CTT</b> <u>TCA GCG ATT GAG CAT GAA GGT</u>                                 |
| <i>pelF</i> -del-BADGr-upR   | <u>TCA TGC AAT CTC CGT GGC TTC CGG AGC GGT GTG</u><br><u>TTC GGT CAT</u>              |
| <i>pelF</i> -del-BADGr-downF | <u>GAA GCC ACG GAG ATT GCA TGA</u>                                                    |

---

**Sequencing primers**

|                    |                                      |
|--------------------|--------------------------------------|
| M13F               | <u>GTA AAA CGA CGG CCA G</u>         |
| M13R               | <u>CAG GAA ACA GCT ATG AC</u>        |
| <i>rmcA</i> -SEQ-F | <u>TGG ACA TGC CTG AGG ACA AG</u>    |
| <i>rmcA</i> -SEQ-R | <u>CGC CTG TTT CAG CAC GTC AAA A</u> |

|                       |                                          |
|-----------------------|------------------------------------------|
| <i>morA</i> -SEQ-F    | <u>CGG ACT TCC TCG ACC CG</u>            |
| <i>morA</i> -SEQ-R    | <u>CGC CAT GGG CCA GGC T</u>             |
| miniTn7-SEQ-F         | <u>GCG GAT CCT ACC TGA CGC TT</u>        |
| miniTn7-SEQ-R         | <u>AAC TTC AGA GCG CTT TTG AA</u>        |
| pUT18C-SEQ-F          | <u>CTC GCC GGA TGT ACT GGA AAC</u>       |
| pUT18C-SEQ-R          | <u>CGG GGC TGG CTT AAC TAT GC</u>        |
| pKT25-SEQ-F           | <u>GGC GCG CAG TTC GGT GAC CAG CGG C</u> |
| pKT25-SEQ-R           | <u>GGG ATG TGC TGC AAG GCG ATT AAG</u>   |
| pBADGr-SEQ-F          | <u>ATG CCA TAG CAT TTT TAT CC</u>        |
| pBADGr-SEQ-R          | <u>GAT TTA ATC TGT ATC AGG</u>           |
| <i>rncA</i> -SEQ-int1 | <u>GGA GAT CGA GCG ACT CCA GG</u>        |
| <i>rncA</i> -SEQ-int2 | <u>CGA GCA GCA GAT CGG CAT CG</u>        |
| <i>rncA</i> -SEQ-int3 | <u>TCA ACC GCG CCT TCA GCG AG</u>        |
| <i>rncA</i> -SEQ-int4 | <u>ATC GCC CTG TTC CCC AAG GA</u>        |
| <i>morA</i> -SEQ-int1 | <u>TGC TCG ACG ACA TGC AGA CC</u>        |
| <i>morA</i> -SEQ-int2 | <u>TGC GCC AGG CTC TTG TGG AG</u>        |
| <i>morA</i> -SEQ-int3 | <u>TGG CAC TGG TTC GAC ATC CG</u>        |
| <i>morA</i> -SEQ-int4 | <u>ACC GCC AGG AAG CCA ACC AG</u>        |

---

\*Restriction sites and Gateway *att* sequences are bolded; regions of complementary to the target amplicon are underlined; regions of reverse complementarity (to facilitate splicing) are italicized; synthetic ribosomal binding sites are in bold italics



## References

1. Hoang TT, Karkhoff-Schweizer RR, Kutchma AJ, Schweizer HP. 1998. A broad-host-range F1p-FRT recombination system for site-specific excision of chromosomally-located DNA sequences: Application for isolation of unmarked *Pseudomonas aeruginosa* mutants. *Gene* 212:77–86.
2. Colvin KM, Alnabelseya N, Baker P, Whitney JC, Lynne Howell P, Parsek MR. 2013. PelA deacetylase activity is required for *pel* polysaccharide synthesis in *Pseudomonas aeruginosa*. *Journal of Bacteriology* 195:2329–2339.
3. Rahme LG, Stevens EJ, Wolfort SF, Shao J, Tompkins RG, Ausubel FM. 1995. Common virulence factors for bacterial pathogenicity in plants and animals. *Science* 268:1899–1902.
4. Ha DG, Richman ME, O'Toole GA. 2014. Deletion mutant library for investigation of functional outputs of cyclic diguanylate metabolism in *Pseudomonas aeruginosa* PA14. *Applied and Environmental Microbiology* 80:3384–3393.
5. Heussler GE, Cady KC, Koeppen K, Bhujji S, Stanton BA, O'Toole GA. 2015. Clustered regularly interspaced short palindromic repeat-dependent, biofilm-specific death of *Pseudomonas aeruginosa* mediated by increased expression of phage-related genes. *mBio* 6:1–13.
6. Friedman L, Kolter R. 2004. Two genetic loci produce distinct carbohydrate-rich structural components of the. *Journal of bacteriology* 186:4457–4465.
7. Friedman L, Kolter R. 2004. Genes involved in matrix formation in *Pseudomonas aeruginosa* PA14 biofilms. *Molecular Microbiology* 51:675–690.
8. Colvin KM, Gordon VD, Murakami K, Borlee BR, Wozniak DJ, Wong GCL, Parsek MR. 2011. The Pel polysaccharide can serve a structural and protective role in the biofilm matrix of *Pseudomonas aeruginosa*. *PLoS Pathogens* 7:e1001264.
9. Kolter R, Bloemberg G V, O'Toole G, Lugtenberg BJ. 1997. Green fluorescent protein as a marker for *Pseudomonas* spp. *Applied and Environmental Microbiology* 63:4543.
10. Shanks RMQ, Caiazza NC, Hinsa SM, Toutain CM, O'Toole GA. 2006. *Saccharomyces cerevisiae*-based molecular tool kit for manipulation of genes from gram-negative bacteria. *Applied and Environmental Microbiology* 72:5027–5036.
11. Dahlstrom KM, Giglio KM, Sondermann H, O'Toole GA. 2016. The inhibitory site of a diguanylate cyclase is a necessary element for interaction and signaling with an effector protein. *Journal of Bacteriology* 198:1595–1603.
12. Choi KH, Gaynor JB, White KG, Lopez C, Bosio CM, Karkhoff-Schweizer RAR,

- Schweizer HP. 2005. A Tn7-based broad-range bacterial cloning and expression system. *Nature Methods* 2:443–448.
13. Choi KH, Schweizer HP. 2005. An improved method for rapid generation of unmarked *Pseudomonas aeruginosa* deletion mutants. *BMC Microbiology* 5:1–11.
  14. Karimova G, Ullmann A, Ladant D. 2001. Protein-protein interaction between *Bacillus stearothermophilus* tyrosyl-tRNA synthetase subdomains revealed by a bacterial two-hybrid system. *Journal of Molecular Microbiology and Biotechnology* 3:73–82.
  15. Whitfield GB, Marmont LS, Ostaszewski A, Rich JD, Whitney JC, Parsek MR, Harrison JJ, Howell PL. 2020. Pel polysaccharide biosynthesis requires an inner membrane complex comprised of PelD, PelE, PelF, and PelG. *Journal of bacteriology* 202:e00684-19.
  16. Asikyan ML, Kus J V., Burrows LL. 2008. Novel proteins that modulate type IV pilus retraction dynamics in *Pseudomonas aeruginosa*. *Journal of Bacteriology* 190:7022–7034.
